# Supplementary material for: Quiescence, Stemness and Adipogenic Differentiation Capacity in Human DLK1−/CD34+/CD24+ Adipose Stem/Progenitor Cells
Source: PubMed Central journal article supplement (PMC7912596; doi:10.3390/cells10020214), 2021-01-22
Supplement: cells-10-00214-s001.pdf [file cells-10-00214-s001.pdf]

**Supplementary Table S1.** Clinical anthropometric parameters of the donors.

| Donor | Sex | Age (Years) | Height (cm) | Weight (kg) | BMI   |
|-------|-----|-------------|-------------|-------------|-------|
| 1     | f   | 47          | 150         | 59          | 26.22 |
| 2     | f   | 57          | 174         | 84          | 27.74 |
| 3     | f   | 33          | 160         | 60          | 23.44 |
| 4     | f   | 38          | 160         | 60          | 23.44 |
| 5     | f   | 49          | 161         | 64          | 24.69 |
| 6     | m   | 25          | 180         | 125         | 38.58 |
| 7     | f   | 34          | 165         | 68          | 24.98 |
| 8     | f   | 23          | 175         | 74          | 24.16 |
| 9     | f   | 33          | 153         | 53          | 22.64 |
| 10    | m   | 31          | 193         | 115         | 30.87 |
| 11    | f   | 29          | 152         | 59          | 25.54 |
| 12    | f   | 37          | 162         | 50          | 19.05 |
| 13    | m   | 49          | 182         | 105         | 31.7  |
| 14    | f   | 35          | 167         | 62          | 22.23 |
| 15    | f   | 29          | 172         | 68          | 22.99 |
| 16    | m   | 18          | 183         | 82          | 24.49 |

**Supplementary Table 2.** Primer sequences.

| Name                    | Sequence 5'-3'                |
|-------------------------|-------------------------------|
| Sox2 forward            | GGGAAATGGGAGGGGTGCAAAGAGG     |
| Sox2 reverse            | TTGCGTGAGTGTGGATGGGATTGGTG    |
| Oct4 forward            | GACAGGGGGAGGGGAGGAGCTAGG      |
| Oct4 reverse            | CTTCCCTCCAACCAGTTGCCCAAAC     |
| cMyc forward            | GCGTCCTGGGAAGGGAGATCCGGAGC    |
| cMyc reverse            | TTGAGGGGCATCGTCGCGGGAGGCTG    |
| NANOG forward           | CAGCCCCGATTCTTCCACCAGTCCC     |
| NANOG reverse           | CGGAAGATTCCCAGTCGGGTTCCACC    |
| KLF4 forward            | GAAATTCGCCCCGCTCCGATGA        |
| KLF4 reverse            | CTGTGTGTTTGGCGTAGTGCC         |
| Ki67 forward            | TGACCCTGATGAGAAAGCTCAA        |
| Ki67 reverse            | CCCTGAGCAACACTGTCTTTT         |
| p16 forward             | CCCCACTACCGTAAATCTCCAT        |
| p16 reverse             | CTGCCATTTGCTAGCAGTGTGACT      |
| p21 forward             | AGACCAGCATGACAGATTTC          |
| p21 reverse             | ACTGAGACTAAGGCAGAAGA          |
| p27 forward             | CGGGGTATGAAGAGCTTGCTTTGAT     |
| p27 reverse             | AACATTCAAAACCTCCAAGCACCTC     |
| p57 forward             | GATCAAGAAGCTGTCCGGGC          |
| p57 reverse             | TTGCTGCTACATGAACGGTCC         |
| CyclinA2 forward        | TTGATAGATGCTGACCCATACCTC      |
| CyclinA2 reverse        | ATGATTCAGGCCAGCTTTGTCC        |
| C/EBP $\beta$ forward   | AAG CAC AGC GAC GAG TAC AA    |
| C/EBP $\beta$ reverse   | AGC TGC TCC ACC TTC TTC TG    |
| C/EBP $\delta$ forward  | TCAGCAACGACCCATACCTCAG        |
| C/EBP $\delta$ reverse  | CTTTGCGCTCCTATGTCCAAG         |
| PPAR $\gamma$ 2 forward | ATG GGT GAA ACT CTG GGA GA    |
| PPAR $\gamma$ 2 reverse | TGG AAT GTC TTC GTA ATG TGG A |

|                   |                        |
|-------------------|------------------------|
| FABP4 forward     | TACTGGGCCAGGAATTTGAC   |
| FABP4 reverse     | GTGGAAGTGACGCCTTTCAT   |
| Perilipin forward | GACAACGTGGTGGACACAGT   |
| Perilipin reverse | CTGGTGGGTTGTCGATGTC    |
| RPS18 forward     | GGCCGAAGATATGCTCATGTGG |
| RPS18 reverse     | TGGTGATCACACGTTCCACCTC |

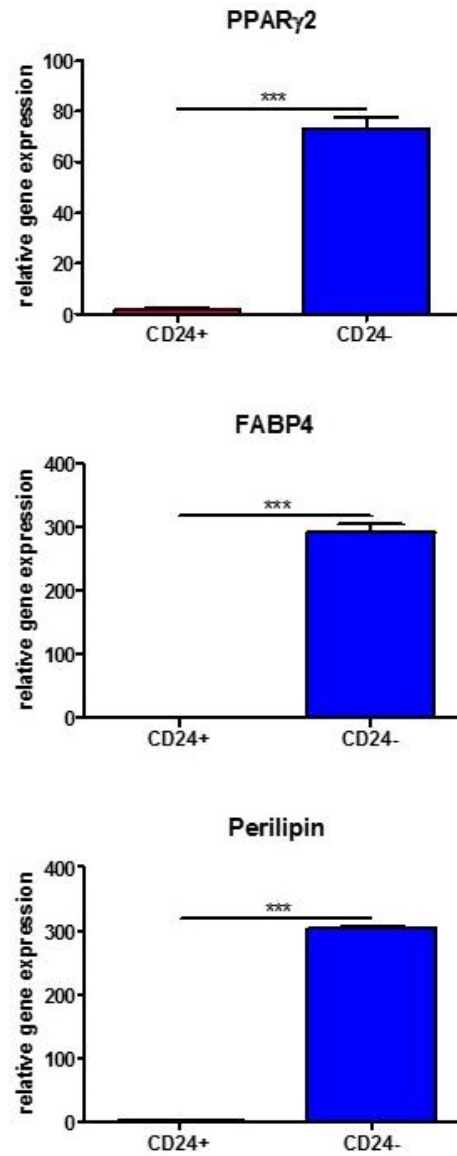

**Supplementary Figure S1.** Adipogenic differentiation boosted with Troglitazone. Adipogenic differentiation was induced by hormone cocktail plus 5  $\mu$ M Troglitazone and measured after 9 days by RT-qPCR for PPAR $\gamma$ 2, FABP4 and Perilipin. n = 3, gene expression was normalized to RPS18, unpaired student's t-test was performed to calculate significances with \*\*\*  $p < 0.001$ .

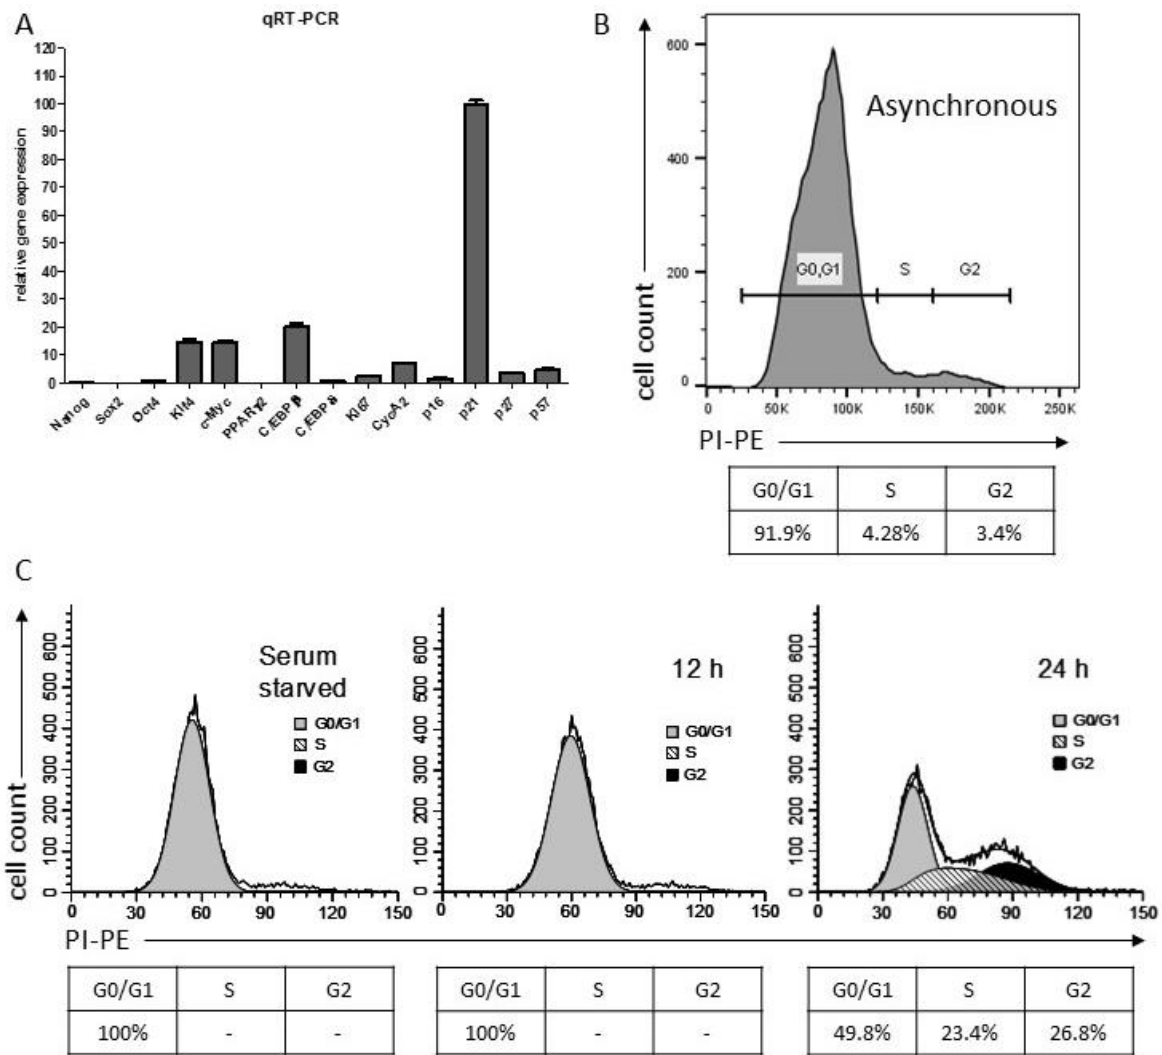

**Supplementary Figure S2.** Marker gene expression and cell cycle profile in routinely cultivated ASCs. ASCs routinely isolated by the plastic adherence protocol and stored at  $-80^{\circ}\text{C}$  were taken into culture and grown until passage 2 (14 days in culture). ASCs were harvested at 70% confluence and lysed for RNA isolation to perform RT-qPCR for gene expression analysis of Cyclin A2, Ki67 (proliferation), p16<sup>INK4a</sup> (senescence), p21<sup>Cip1</sup>, p27<sup>Kip1</sup>, p57<sup>Kip2</sup> (quiescence), NANOG, OCT4, SOX2 (pluripotency), KLF4, c-MYC, (stemness), PPAR $\gamma$ 2, C/EBP $\beta$  and C/EBP $\delta$  (adipogenesis). Mean + SEM is shown,  $n = 4$  donors, gene expression normalized to RPS18. **(B)** Cell cycle profile of normal asynchronously proliferating human ASCs. To measure this, the DNA of the cells was stained by propidium iodide and analyzed by FACS. **(C)** Cell cycle profile of ASCs in a serum-arrest/release experiment. ASCs were serum starved for 2 days and the cell cycle profile was monitored before and after re-addition of serum at indicated time points.
